# Supplementary material for: Blood flow-restricted resistance exercise alters the surface profile, miRNA cargo and functional impact of circulating extracellular vesicles
Source: PubMed Central journal article supplement (PMC7125173; doi:10.1038/s41598-020-62456-3), 2020-04-03
Supplement: 41598_2020_62456_MOESM1_ESM.pdf [file 41598_2020_62456_MOESM1_ESM.pdf]

*Supplementary Tables and Figures*

**Title**

**Blood flow-restricted resistance exercise alters the surface profile, miRNA cargo and functional impact of circulating extracellular vesicles**

**Authors**

Jesper Just<sup>1\*</sup>

Yan Yan<sup>2\*</sup>

Jean Farup<sup>4,5</sup>

Peter Sieljacks<sup>3</sup>

Mette Sloth<sup>1</sup>

Morten Venø<sup>2</sup>

Tingting Gu<sup>1</sup>

Frank Vincenzo de Paoli<sup>6</sup>

Jens Randel Nyengaard<sup>7</sup>

Rikke Bæk<sup>8</sup>

Malene Møller Jørgensen<sup>8</sup>

Jørgen Kjems<sup>2, 2a</sup>

Kristian Vissing<sup>3</sup>

Kim Ryun Drasbek<sup>1\*</sup>

**Supplementary Table S1: EVarray antibodies**

| <b>Antibody target</b> | <b>Clone (if available)</b> | <b>Supplier</b>                     |
|------------------------|-----------------------------|-------------------------------------|
| CD11a                  | HI111                       | Ab biotec, CA, USA                  |
| EGFR                   |                             | Antibodies-online.com, Germany      |
| CD146                  | P1H12                       | Abcam, UK                           |
| Hsp90                  | IGF1                        | Abcam, UK                           |
| p53                    | pAb240                      | Abcam, UK                           |
| Flotillin-1            |                             | Abcam, UK                           |
| LRP-1                  |                             | Abcam, UK                           |
| N-Cadherin             | 8C119                       | Abcam, UK                           |
| CD63                   |                             | AbD serotec /Bio-Rad, CA, USA       |
| CD9                    |                             | Ancell, MN, USA                     |
| CD81                   |                             | Ancell, MN, USA                     |
| CD3                    | Hit3a                       | BD Biosciences, CA, USA             |
| CD28                   | L293                        | BD Biosciences, CA, USA             |
| CD49d                  | L25                         | BD Biosciences, CA, USA             |
| CD56                   | 3G8                         | BD Biosciences, CA, USA             |
| CD25                   | M-A251                      | BD Biosciences, CA, USA             |
| TGFβ1                  |                             | BD Biosciences, CA, USA             |
| Alix                   | 3A9                         | Biolegend, CA, USA                  |
| VEGFR2                 | 7D4-6                       | Biolegend, CA, USA                  |
| HER2                   | 29D8                        | Cell Signalling, MA, USA            |
| ICAM-1                 | R6.5                        | eBioscience, CA, USA                |
| Annexin V              |                             | R&D Systems, MN, USA                |
| CD19                   | 4G7-2E3                     | R&D Systems, MN, USA                |
| CD4                    | 34930                       | R&D Systems, MN, USA                |
| LAMP1                  |                             | R&D Systems, MN, USA                |
| LAMP2                  | H4A3                        | R&D Systems, MN, USA                |
| CD82                   | 423524                      | R&D Systems, MN, USA                |
| CD106                  | HAE-2Z                      | R&D Systems, MN, USA                |
| Thrombospondin         |                             | R&D Systems, MN, USA                |
| CD31                   |                             | R&D Systems, MN, USA                |
| CD42b                  |                             | R&D Systems, MN, USA                |
| CD235a                 |                             | R&D Systems, MN, USA                |
| PD-L1                  | 130021                      | R&D Systems, MN, USA                |
| Hsp70                  | 242707                      | R&D Systems, MN, USA                |
| CD13                   | 498001                      | R&D Systems, MN, USA                |
| CD142                  | 323514                      | R&D Systems, MN, USA                |
| TNF RI                 |                             | R&D Systems, MN, USA                |
| TNF RII                |                             | R&D Systems, MN, USA                |
| EpCam                  | 0.N.277                     | Santa Cruz Biotechnologies, TX, USA |
| c-MET                  | 016                         | Sino Biological Inc., China         |

List of antibodies included in the EVarray

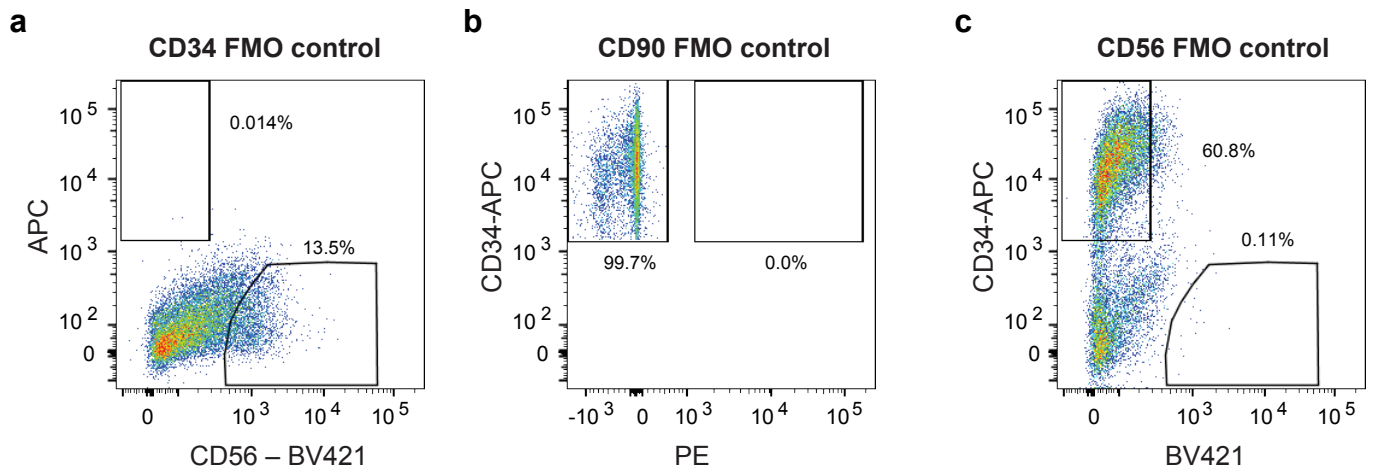

**Supplementary Figure S1. Fluorescence minus one (FMO) controls.**

To ensure specific gating of FAPs and MuSCs from a single cell suspension of skeletal muscle tissue, all gates were verified using a series of staining patterns that lacks just one of the fluorescent antibodies used for selection: CD34-APC (a), CD90-PE (b), and CD56-BV421 (c).

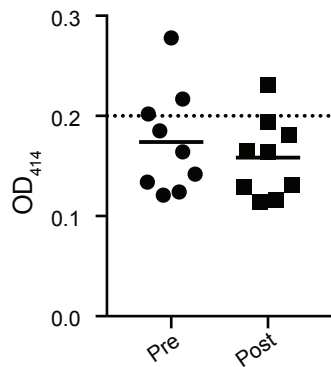

**Supplementary Figure S2. Haemolysis levels of plasma samples.**

The level of haemolysis in the BFRE plasma samples was assessed by measuring the absorbance of free haemoglobin at 414 nm. If OD<sub>414</sub> exceeded 0.2, the plasma sample was considered to be affected by haemolysis.

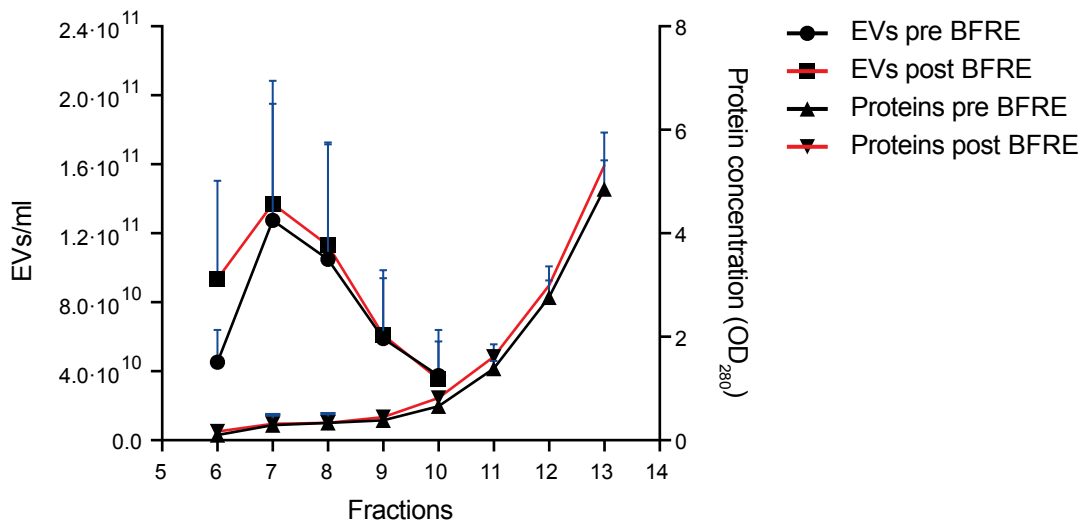

**Supplementary Figure S3. Size exclusion chromatography elution profiles.**

EV elution profile for a qEV size exclusion column when 1 ml plasma was loaded and fractions of 0.5 ml were collected. All pre and post BFRE plasma samples were analysed. A qNano Gold equipped with a NP100 Nanopore was used to determine size and concentration of EVs in the fractions eluted by SEC. EV samples were analysed under identical settings - the same diluent, stretch (45mm), pressure (10Pa) and voltage (0.7mV) as used for CPC100 calibration particles. To analyse protein contaminants, OD280 was measured on a nanodrop 2000. EVs devoid of protein contamination were present in fraction 6-9.

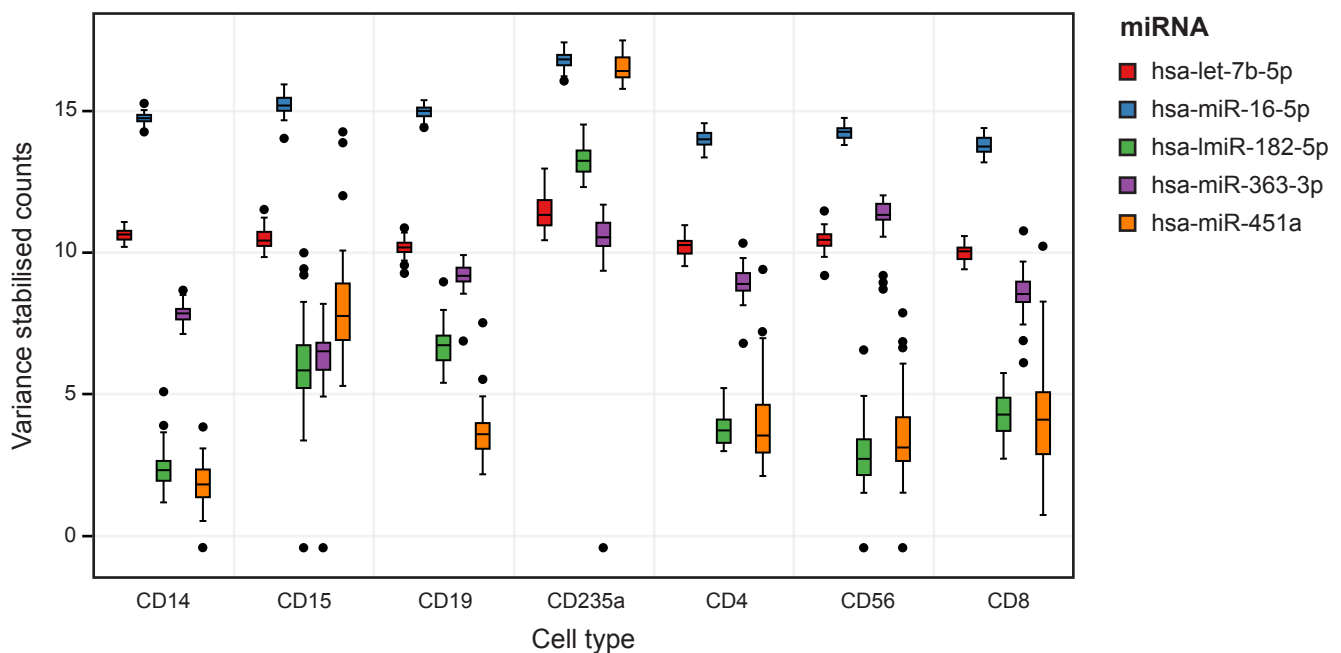

**Supplementary Figure S4. Differentially expressed miRNAs prevalence in blood cell types.**

The expression of the five up-regulated differentially expressed BFRE EV miRNAs in seven types of human peripheral blood cells. The plot was created using the interactive web tool: <http://134.245.63.235/ikmb-tools/bloodmiRs>. Most of the up-regulated miRNAs, especially miR-182-5p and miR-451a, were enriched in CD235a positive cells, while miR-16-5p was expressed in all cell types.

**Supplementary Table S2. Gene targets of the differentially expressed EV miRNAs.**

| Gene target  | Gene targeting miRNAs | Gene target | Gene targeting miRNAs | Gene target | Gene targeting miRNAs |
|--------------|-----------------------|-------------|-----------------------|-------------|-----------------------|
| NUFIP2       | 8                     | HSPA1B      | 4                     | WEE1        | 4                     |
| CCND2        | 6                     | HSPA8       | 4                     | SOCS3       | 4                     |
| E2F3         | 6                     | LBR         | 4                     | SOCS5       | 4                     |
| IGF1R        | 6                     | PRIM1       | 4                     | MORF4L1     | 4                     |
| MYC          | 6                     | MAPK1       | 4                     | ABHD2       | 4                     |
| hsa-mir-451a | 5                     | SP1         | 4                     | SF3B3       | 4                     |
| CDK6         | 5                     | THBS1       | 4                     | RACGAP1     | 4                     |
| CDKN1A       | 5                     | TIAM1       | 4                     | TMEM138     | 4                     |
| SKI          | 5                     | TRAPPC10    | 4                     | MRPS10      | 4                     |
| SON          | 5                     | ZNF207      | 4                     | GPAM        | 4                     |
| BTG2         | 5                     | SOCS1       | 4                     | ZMAT3       | 4                     |
| NCOA3        | 5                     | WASL        | 4                     | WNK3        | 4                     |
| TNFRSF10B    | 5                     | MAP7        | 4                     | ATP13A3     | 4                     |
| ZNF460       | 5                     | ZNF264      | 4                     | ORAI2       | 4                     |
| TNRC6B       | 5                     | QKI         | 4                     | DCTN5       | 4                     |
| DICER1       | 5                     | ZBTB5       | 4                     | ACBD5       | 4                     |
| CBX5         | 5                     | LPGAT1      | 4                     | ARHGAP12    | 4                     |
| KPNA6        | 5                     | CDIPT       | 4                     | RAB3IP      | 4                     |
| SZRD1        | 5                     | TGOLN2      | 4                     | PTPDC1      | 4                     |
| YOD1         | 5                     | RNF44       | 4                     | CXorf38     | 4                     |
| LZIC         | 5                     | CPEB3       | 4                     | DYNC1LI2    | 4                     |
| SLC30A7      | 5                     | TMEM2       | 4                     | MBNL1       | 4                     |
| BCL2         | 5                     | TES         | 4                     | MDM2        | 4                     |
| TP53         | 5                     | AGO2        | 4                     | MMP2        | 4                     |
| RECK         | 5                     | SLC38A2     | 4                     | PKNOX1      | 4                     |
| TMEM245      | 5                     | TXLNG       | 4                     | RAB5B       | 4                     |
| PDCD4        | 5                     | RAP2C       | 4                     | ATXN1       | 4                     |
| KLHL15       | 5                     | NUCKS1      | 4                     | SOX4        | 4                     |
| CREB1        | 5                     | ZNF644      | 4                     | ZNF35       | 4                     |
| IPP          | 5                     | PPP1R15B    | 4                     | DEGS1       | 4                     |
| PTEN         | 5                     | YTHDC1      | 4                     | CLOCK       | 4                     |
| BCL2L11      | 5                     | GRPEL2      | 4                     | FRS2        | 4                     |
| SLC7A11      | 5                     | ZNF417      | 4                     | SGTB        | 4                     |
| MYLIP        | 5                     | AGO3        | 4                     | USP28       | 4                     |
| ACTB         | 4                     | FOXK1       | 4                     | GID4        | 4                     |
| AMD1         | 4                     | PGM2L1      | 4                     | PANK3       | 4                     |
| CCND1        | 4                     | CFL2        | 4                     | GATAD2B     | 4                     |
| BCL7A        | 4                     | DDX3X       | 4                     | FOXO3       | 4                     |
| EEF1A1       | 4                     | ITPR1       | 4                     | GK5         | 4                     |
| EIF4A2       | 4                     | TIMP3       | 4                     |             |                       |
| HMGB1        | 4                     | VEGFA       | 4                     |             |                       |

The differentially expressed EV miRNAs were used as input for the miRnet database that integrate high-quality miRNA-target interaction from several databases. Genes targeted by more than three miRNAs were included in the table.
